# Supplementary material for: A Novel Fiber-Optic Ice Sensor to Identify Ice Types Based on Total Reflection
Source: MDPI journal article supplement (doi:10.3390/s23083996), 2023-04-14
Supplement: s1 [file s1]

## Simulation and experimental results

The relationship between the light intensity received by the sensor and the ice thickness during the simulation.

**Table S1.** Simulation of glazed ice.

| glazed ice<br>thickness(mm) | optical<br>Intensity(RF1)(mW) | optical<br>Intensity(RF2)(mW) | optical<br>Intensity(RF3)(mW) |
|-----------------------------|-------------------------------|-------------------------------|-------------------------------|
| 0.0                         | 0.00000000                    | 0.00000000                    | 0.00000000                    |
| 0.5                         | 0.00003157                    | 0.00000000                    | 0.00000000                    |
| 1.0                         | 0.00008785                    | 0.00000000                    | 0.00000000                    |
| 1.5                         | 0.00013059                    | 0.00000266                    | 0.00000000                    |
| 2.0                         | 0.00012005                    | 0.00000495                    | 0.00000000                    |
| 2.5                         | 0.00009753                    | 0.00002320                    | 0.00000000                    |
| 3.0                         | 0.00007784                    | 0.00003874                    | 0.00000000                    |
| 3.5                         | 0.00006127                    | 0.00003850                    | 0.00000000                    |
| 4.0                         | 0.00004726                    | 0.00003662                    | 0.00000000                    |
| 4.5                         | 0.00003450                    | 0.00003418                    | 0.00000000                    |
| 5.0                         | 0.00002791                    | 0.00003157                    | 0.00000000                    |

**Table S2.** Simulation of rime ice1.

| rime ice1<br>thickness(mm) | optical<br>Intensity(RF1)(mW) | optical<br>Intensity(RF2)(mW) | optical<br>Intensity(RF3)(mW) |
|----------------------------|-------------------------------|-------------------------------|-------------------------------|
| 0.0                        | 0.00000000                    | 0.00000000                    | 0.00000000                    |
| 0.5                        | 0.00002343                    | 0.00000249                    | 0.00000000                    |
| 1.0                        | 0.00006510                    | 0.00001692                    | 0.00000071                    |
| 1.5                        | 0.00007285                    | 0.00003010                    | 0.00000141                    |
| 2.0                        | 0.00007177                    | 0.00004081                    | 0.00000215                    |
| 2.5                        | 0.00007958                    | 0.00004663                    | 0.00000319                    |
| 3.0                        | 0.00008018                    | 0.00005135                    | 0.00000388                    |
| 3.5                        | 0.00008343                    | 0.00005554                    | 0.00000458                    |
| 4.0                        | 0.00008683                    | 0.00005631                    | 0.00000458                    |
| 4.5                        | 0.00008817                    | 0.00005812                    | 0.00000458                    |
| 5.0                        | 0.00009010                    | 0.00005954                    | 0.00000529                    |

**Table S3.** Simulation of rime ice2.

| rime ice2<br>thickness(mm) | optical<br>Intensity(RF1)(mW) | optical<br>Intensity(RF2)(mW) | optical<br>Intensity(RF3)(mW) |
|----------------------------|-------------------------------|-------------------------------|-------------------------------|
| 0.0                        | 0.00000000                    | 0.00000000                    | 0.00000000                    |
| 0.5                        | 0.00020422                    | 0.00000905                    | 0.00000790                    |
| 1.0                        | 0.00038313                    | 0.00003579                    | 0.00001957                    |
| 1.5                        | 0.00046222                    | 0.00006134                    | 0.00002728                    |
| 2.0                        | 0.00049775                    | 0.00007795                    | 0.00003054                    |
| 2.5                        | 0.00051147                    | 0.00009245                    | 0.00003231                    |
| 3.0                        | 0.00051892                    | 0.00009814                    | 0.00003264                    |



|     |            |            |            |
|-----|------------|------------|------------|
| 3.5 | 0.00052194 | 0.00010126 | 0.00003369 |
| 4.0 | 0.00052417 | 0.00010529 | 0.00003406 |
| 4.5 | 0.00052707 | 0.00010603 | 0.00003512 |
| 5.0 | 0.00052768 | 0.00010772 | 0.00003548 |

The relationship between the voltage output by the sensor and the ice thickness during the experiment.

**Table S4.** The experiment of glazed ice.

| glazed ice thickness(mm) | Out voltage(RF1)(V) | Out voltage (RF2)(V) | Out voltage (RF3)(V) |
|--------------------------|---------------------|----------------------|----------------------|
| 0.000                    | 0.0000              | 0.0000               | 0.0000               |
| 0.512                    | 0.0151              | 0.0000               | 0.0012               |
| 0.989                    | 0.0294              | 0.0000               | 0.0012               |
| 1.524                    | 0.0627              | 0.0059               | 0.0012               |
| 1.991                    | 0.0836              | 0.0098               | 0.0013               |
| 2.472                    | 0.0725              | 0.0214               | 0.0013               |
| 3.102                    | 0.0675              | 0.0279               | 0.0011               |
| 3.564                    | 0.0517              | 0.0267               | 0.0013               |
| 4.091                    | 0.0408              | 0.0258               | 0.0012               |
| 4.493                    | 0.0340              | 0.0247               | 0.0011               |
| 5.017                    | 0.0257              | 0.0234               | 0.0013               |

**Table S5.** The experiment of rime ice1.

| rime ice1 thickness(mm) | Out voltage(RF1)(V) | Out voltage (RF2)(V) | Out voltage (RF3)(V) |
|-------------------------|---------------------|----------------------|----------------------|
| 0.000                   | 0.0000              | 0.0000               | 0.0000               |
| 0.491                   | 0.0591              | 0.0051               | 0.0020               |
| 1.098                   | 0.0690              | 0.0084               | 0.0020               |
| 1.476                   | 0.0843              | 0.0181               | 0.0021               |
| 1.987                   | 0.0859              | 0.0280               | 0.0021               |
| 2.563                   | 0.0867              | 0.0291               | 0.0021               |
| 2.987                   | 0.0979              | 0.0380               | 0.0023               |
| 3.486                   | 0.1017              | 0.0485               | 0.0023               |
| 4.067                   | 0.1112              | 0.0538               | 0.0023               |
| 4.476                   | 0.1190              | 0.0632               | 0.0023               |
| 5.058                   | 0.1261              | 0.0682               | 0.0023               |

**Table S6.** The experiment of rime ice2.

| rime ice2 thickness(mm) | Out voltage(RF1)(V) | Out voltage (RF2)(V) | Out voltage (RF3)(V) |
|-------------------------|---------------------|----------------------|----------------------|
| 0.000                   | 0.0000              | 0.0000               | 0.0000               |
| 0.537                   | 0.4013              | 0.0134               | 0.0060               |
| 1.093                   | 0.524               | 0.0366               | 0.0071               |
| 1.554                   | 0.5333              | 0.0658               | 0.0081               |
| 2.103                   | 0.544               | 0.1145               | 0.0081               |



|       |        |        |        |
|-------|--------|--------|--------|
| 2.495 | 0.5582 | 0.1307 | 0.008  |
| 2.975 | 0.5720 | 0.1575 | 0.0087 |
| 3.548 | 0.5819 | 0.1698 | 0.0088 |
| 4.074 | 0.5950 | 0.1814 | 0.0091 |
| 4.564 | 0.6035 | 0.1990 | 0.0091 |
| 5.116 | 0.6109 | 0.2019 | 0.0090 |

---
